# Supplementary material
Source: publisher figshare collection journal article supplement (https://karger.figshare.com/ndownloader/files/13205522)
Supplement: Supplementary file 1 [file 13205522]

## Online Supplementary Material

### **A comparison of simple analytical methods for determination of fluoride in microlitre-volume plasma samples**

FV Zohoori<sup>1</sup>, A Maguire<sup>2</sup>, EA Martinez-Mier<sup>3</sup>, M Buzalaf<sup>4</sup>, R Sanderson<sup>5</sup>, GJ Eckert<sup>6</sup>,

<sup>1</sup> School of Health and Social Care, Teesside University, UK

<sup>2</sup> Centre for Oral Health Research (COHR), School of Dental Sciences, Newcastle University, UK

<sup>3</sup> Operative Dentistry and Dental Public Health, Indiana University School of Dentistry, US

<sup>4</sup> Bauru School of Dentistry, University of São Paulo, Brazil

<sup>5</sup> Evidence & Policy Research Group, School of Natural & Environmental Science, Newcastle University, UK

<sup>6</sup> Biostatistician Supervisor in Biostatistics, School of Medicine, Indiana University, US

Short title: Determination of fluoride in microlitre-volume plasma

Key words: Fluoride, plasma, method, microlitre-volume

Corresponding author:

Professor FatemehVida Zohoori;

Health and Social Care Institute

Teesside University

Middlesbrough, TS1 3BA

UK

The current supplement presents the three analytical protocols which were used in this manuscript: 1) gold standard HMDS-diffusion method [Martínez-Mier et al., 2011]; 2) Micro-diffusion method [Martínez-Mier et al., 2010]; and 3) Known-addition technique [Ekstrand, 1977; Thermo Electron Corporation Instruction Manual, 2003].

#### References:

Ekstrand J: A micromethod for the determination of fluoride in blood plasma and saliva. *Calcif Tissue Res* 1977;23:225-228.

Martínez-Mier E, Buckley C, Chandrappa P, Soto-Rojas AE: Development of a Standard Fluoride Analytical Method for Dental Plaque. *J Dent Res* 2010;89:931.

Martínez-Mier EA, Cury J.A., Heilman J.R. , Katz B.P., Levy S.M., Li Y., Maguire A., Margineda J., O'Mullane D., Phantumvanit P., Soto-Rojas A.E., Stookey G.K., Villa A., Wefel J.S., Whelton H. , Whitford G.M., Zero D.T., Zhang W., Zohouri V: Development of gold standard ion-selective electrode-based methods for fluoride analysis *Caries Res* 2011;45:3-12.

Thermo Electron Corporation. Fluoride electrode instruction manual. Thermo Orion, 235238-001 rev. B; 2003.

## HMDS-diffusion Method

---

### Step 1) Setting up Diffusion

- i) Make a small hole in the lid of each polyethylene petri dish using a soldering iron.
- ii) Place 1.0 g of each F standard, sample or blank into the bottom of individual petri dishes. Add 2.0 mL of DDiH<sub>2</sub>O.
- iii) Pipette **50  $\mu$ L** of the 0.05N NaOH (i.e. trapping solution) on the inside surface of the top portion (lid) of the petri-dish in **3-5** equal drops. Position the lid on the dish. Seal the petri dish with Vaseline and/or parafilm, ensuring a **tight seal is formed**.
- iv) Pipette **1.0 mL** of 3N HMDS-saturated H<sub>2</sub>SO<sub>4</sub> through the hole and **immediately** seal the hole with Vaseline and/or seal with parafilm. Gently rotate each dish to assure mixing (this should be repeated periodically during the diffusion period). Samples may be placed on a rotary shaker to be gently swirled throughout the diffusion process). Allow the standards and samples to diffuse for **16-24** hours at room temperature.

### Step 2) Preparation of NaOH Trap for Analysis

Gently remove the lid from the first petri dish. Add **25  $\mu$ L** of 0.2N Acetic Acid. Collect the buffered solution in the lid of the petri dish, and adjust the final volume to 75  $\mu$ L by the addition of DDiH<sub>2</sub>O.

### Step 3) Fluoride measurement using Fluoride Ion-Selective Electrode (ISE) and meter

- i) Place the electrode directly on the solution in the petri dish lid, making sure the solution being analysed 'wets' the entire tip of the electrode.
- ii) Verify the meter is in the **mV mode**.
- iii) Allow the electrode to stabilize as defined by manufacturer.
- iv) Record the millivolt reading for the standard or sample or blank on a data sheet.
- v) Construct a calibration line to convert millivolt readings into concentration values

### Note: Checking the drift in the electrode

It is recommended to run a low concentration standard sample (e.g. 0.1 ppmF) alongside each series of analyses to check for a possible drift in the electrode. If the drift in the electrode is more than 3% for the lowest standard, then a new calibration line should be derived using a fresh set of fluoride standards. Therefore;

- Read a low concentration F standard (0.1 ppmF) at the beginning of every run and record the millivolt reading.
- Repeat the reading for the same F standard (0.1 ppmF) after every 21st aliquot analysed (i.e. 7th sample, in triplicate).
- If the change in mV readings was more than +/- 3%, construct a new calibration line using another set of fluoride standards.

## Micro-diffusion Method

---

### Step 1) Setting up Diffusion

- i) Make a small hole in the lid of each polyethylene petri dish using a soldering iron.
- ii) Place **200**  $\mu\text{L}$  of each F standard, sample or blank into the bottom of individual petri dishes. Add **400**  $\mu\text{L}$  of  $\text{DDiH}_2\text{O}$ .
- iii) Pipette **10**  $\mu\text{L}$  of the 0.05N NaOH (i.e. trapping solution) on the inside surface of the top portion (lid) of the petri-dish in 2 equal drops. Position the lid on the dish. Seal the petri dish with Vaseline and/or parafilm, ensuring a **tight seal is formed**.
- iv) Pipette **200**  $\mu\text{L}$  of 3N HMDS-saturated  $\text{H}_2\text{SO}_4$  through the hole and **immediately** seal the hole with Vaseline and/or seal with parafilm. Gently rotate each dish to assure mixing (this should be repeated periodically during the diffusion period). Samples may be placed on a rotary shaker to be gently swirled throughout the diffusion process). Allow the standards and samples to diffuse for **16-24** hours at room temperature.

### Step 2) Preparation of NaOH Trap for Analysis

Gently remove the lid from the first petri dish. Add **5**  $\mu\text{L}$  of 0.2N Acetic Acid. Collect the buffered solution in the lid of the petri dish, and adjust the final volume to 20  $\mu\text{L}$  by the addition of  $\text{DDiH}_2\text{O}$ .

### Step 3) Fluoride measurement using Fluoride Ion-Selective Electrode (ISE) and meter

- i) Place the electrode directly on the solution in the petri dish lid, making sure the solution being analysed 'wets' the entire tip of the electrode.
- ii) Verify the meter is in the **mV mode**.
- iii) Allow the electrode to stabilize as defined by manufacturer.
- iv) Record the millivolt reading for the standard or sample or blank on a data sheet.
- v) Construct a calibration line to convert millivolt readings into concentration values

### Note: Checking the drift in the electrode

It is recommended to run a low concentration standard sample (e.g. 0.1 ppmF) alongside each series of analyses to check for a possible drift in the electrode. If the drift in the electrode is more than 3% for the lowest standard, then a new calibration line should be derived using a fresh set of fluoride standards. Therefore;

- Read a low concentration F standard (0.1 ppmF) at the beginning of every run and record the millivolt reading.
- Repeat the reading for the same F standard (0.1 ppmF) after every 21st aliquot analysed (i.e. 7th sample, in triplicate).
- If the change in mV readings was more than  $\pm 3\%$ , construct a new calibration line using another set of fluoride standards.

## Known-addition Technique

---

### Step 1) Calculation of slope (m) using two F standards

- i) Prepare two F standards: 0.1 and 1 ppm F standards
- ii) Mix each standard with TISAB III (10:1 v/v)
- iii) Measure the mv readings of the standards, directly
- iv) Record the mV readings of the two standards in the excel data sheet
- v) Subtract the first reading from the second reading to find the electrode slope (m)

### Step 2) Preparation of standards for known-addition

Notes:

- Sample concentration should roughly be known (within a factor of three)
  - Concentration ( $\mu\text{g/mL}$ ) of fluoride standards (**Cst**) for each individual sample should be 100 times more concentrated than the sample's concentration.
- i) Prepare fluoride standard solutions for each individual sample according to the estimated concentration of each particular sample: e.g. **Cst** should be  $2 \mu\text{g/mL}$ , if the fluoride concentration of the sample is projected to be around  $0.02 \mu\text{g/mL}$

### Step 3) Sample preparation and analysis

For each individual sample, prepare two aliquots:

- I. Aliquot (I) with no added fluoride standard: Pipette  $200 \mu\text{L}$  (**Vu**) of a sample into a small container and add  $20 \mu\text{L}$  of TISAB III. Measure and record mV (**E1**) of the sample using a fluoride combination electrode and pH/mV meter.
- II. Aliquot (II) with added fluoride standard: Pipette  $200 \mu\text{L}$  (**Vu**) of the same sample into a small container, add  $20 \mu\text{L}$  (**Vs**) of appropriate fluoride standard (**Cst**) and **22  $\mu\text{L}$**  TISAB III. Measure and record mV (**E2**) of the sample using a fluoride combination electrode and pH/mV meter.

### Step 4) Calculation of sample concentration

Use the following formulas to calculate the F concentration of samples:

$$C_u = C_s \times [V_s / (V_u + V_s)] / [(10^{(E_2 - E_1)/m}) - (V_u / (V_u + V_s))]$$

#### Abbreviations:

$C_u$  = F concentration of the unknown sample (ppm)

$C_s$  = F concentration of the F standard (ppm)

$V_s$  = volume of standard ( $\mu\text{L}$ )

$V_u$  = volume of sample ( $\mu\text{L}$ )

$E_1$  = electrode potential (mV) of the sample (aliquot I)

$E_2$  = electrode potential (mV) of the sample after the addition of F standard (aliquot II)

$m$  = the electrode slope.
